# Supplementary material
Source: Springer Nature journal article supplement (https://www.springermedizin.de/resource/supplementary/12974_2011_450_MOESM4_ESM.pdf/9601330)

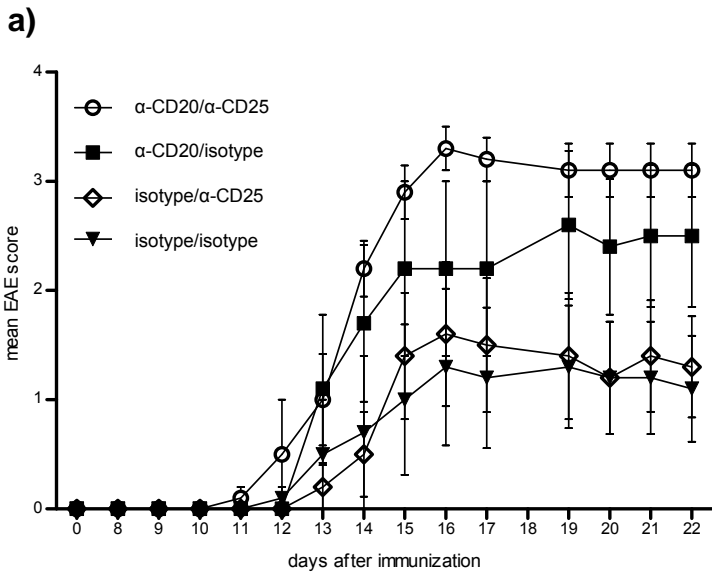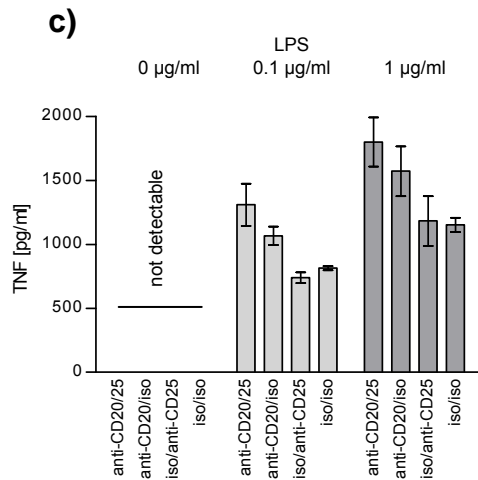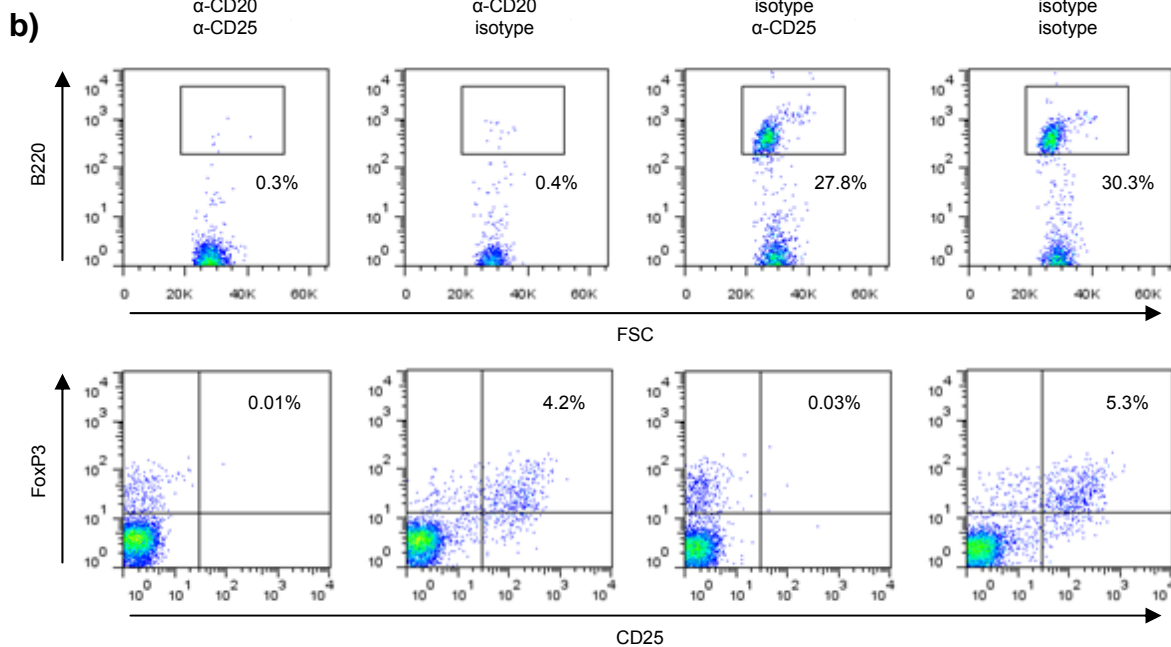

Supplement: MOESM4 [file 9601330]
